---

# Withdrawn

Nuttall FQ, Gannon MC, Hoover H. Glycemic response to ingested Dreamfields pasta compared with traditional pasta. *Diabetes Care* 2011;34:e17–e18

This article has been withdrawn by the authors because some of the data were obtained prior to receiving IRB approval.
